# Supplementary material for: Aerosol Detection from the Cloud–Aerosol Transport System on the International Space Station: Algorithm Overview and Implications for Diurnal Sampling
Source: MDPI journal article supplement (doi:10.3390/atmos13091439), 2022-09-06
Supplement: s1 [file s1]

## Supplementary Materials:

Edward P. Nowottnick <sup>1,\*</sup>, Kenneth E. Christian <sup>2</sup>, John E. Yorks <sup>1</sup>, Matthew J. McGill <sup>3</sup>, Natalie Midzak <sup>4</sup>, Patrick A. Selmer <sup>5</sup>, Zhendong Lu <sup>3</sup>, Jun Wang <sup>3,6</sup> and Santo V. Salinas <sup>7</sup>

### Introduction

The supplemental figures presented here provide additional context to the results discussed in the manuscript. Figure S1 shows the aerosol type from NASA Suomi/NPP Deep Blue courtesy of NASA Worldview: <https://worldview.earthdata.nasa.gov/>. In Figs. S2 and S3, we show back trajectories of two points along the CATS profile shown in Figure 3. These figures were created using the NOAA HYSPLIT web interface: [https://www.ready.noaa.gov/HYSPLIT\\_traj.php](https://www.ready.noaa.gov/HYSPLIT_traj.php). Figure S3 shows the diurnal cycle of aerosol extinction weighted altitudes as observed by CATS and MPLNET for the region denoted in Figure 6.

### Suomi/NPP Deep Blue Aerosol Type on 06 August 2016

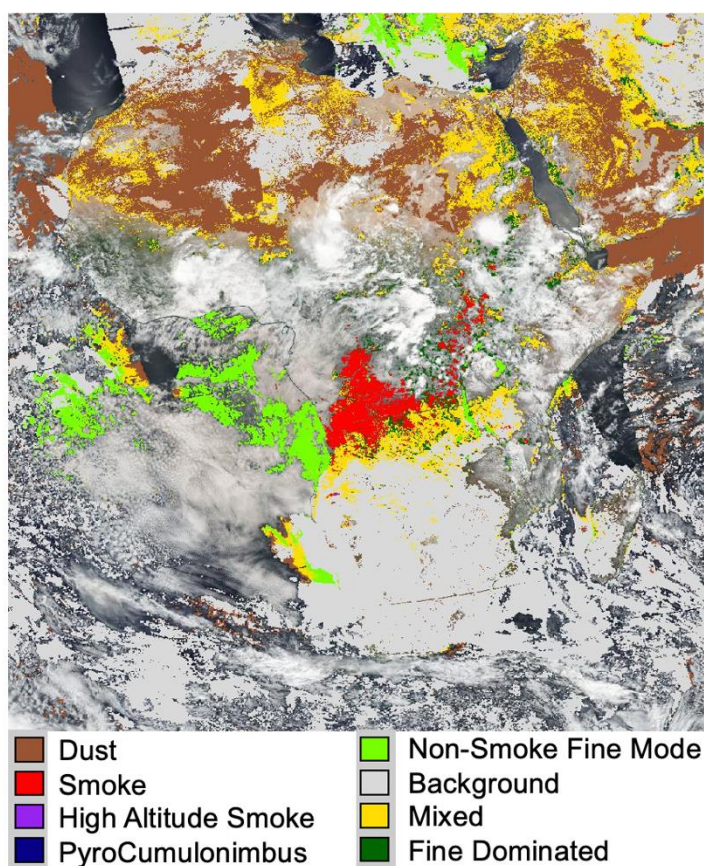

**Figure S1.** Suomi/NPP Deep Blue Aerosol Type on 06 August 2016.

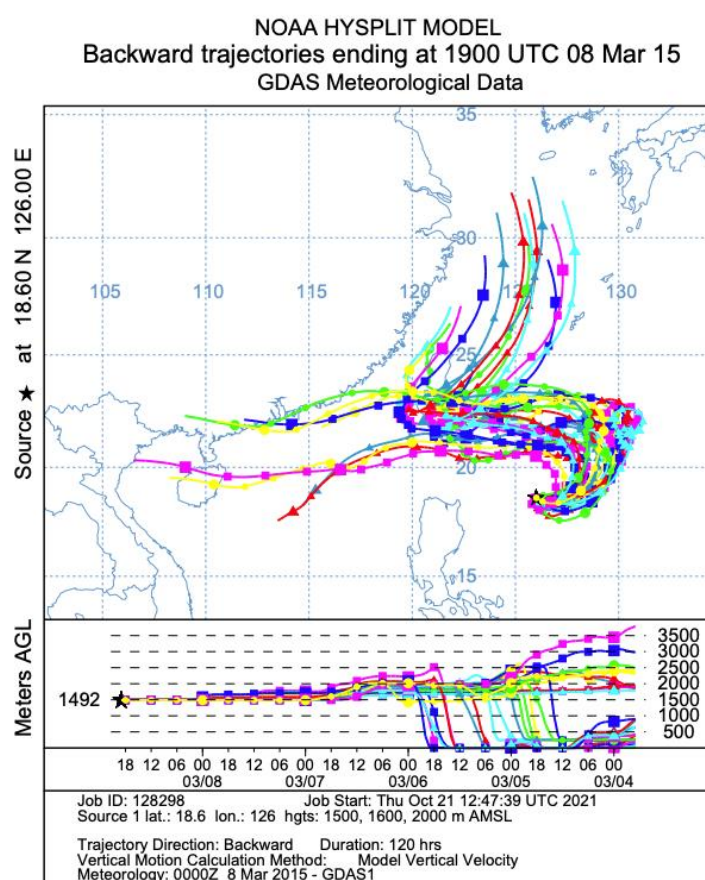

**Figure S2.** HYSPLIT back trajectories for a northeastern point of the CATS profile featured in Figure 3.

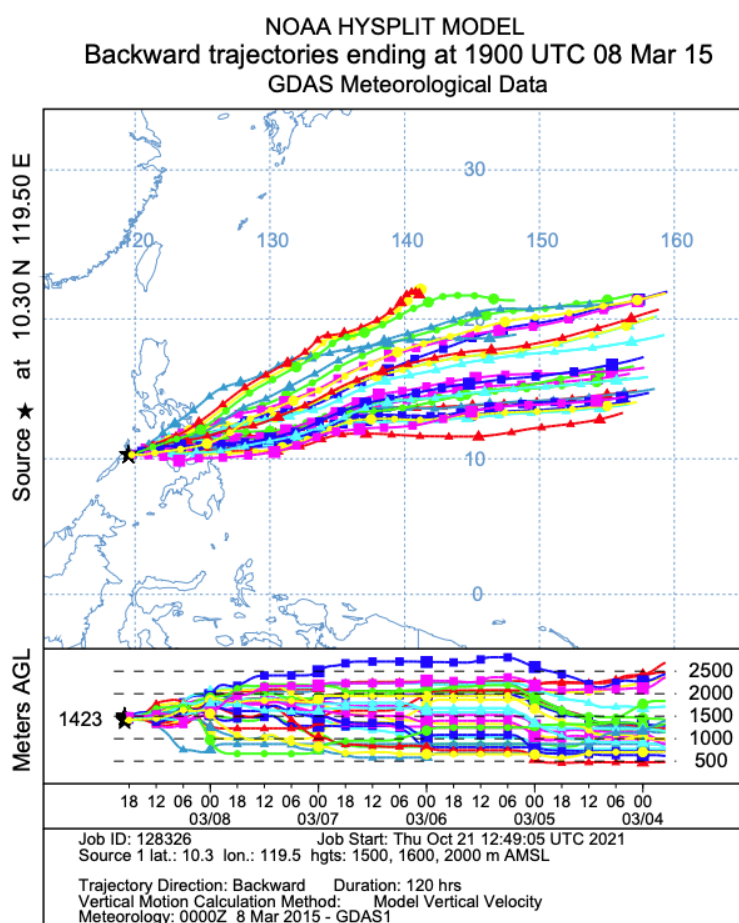

**Figure S3.** HYSPLIT back trajectories for a southwestern point of the CATS profile featured in Figure 3.

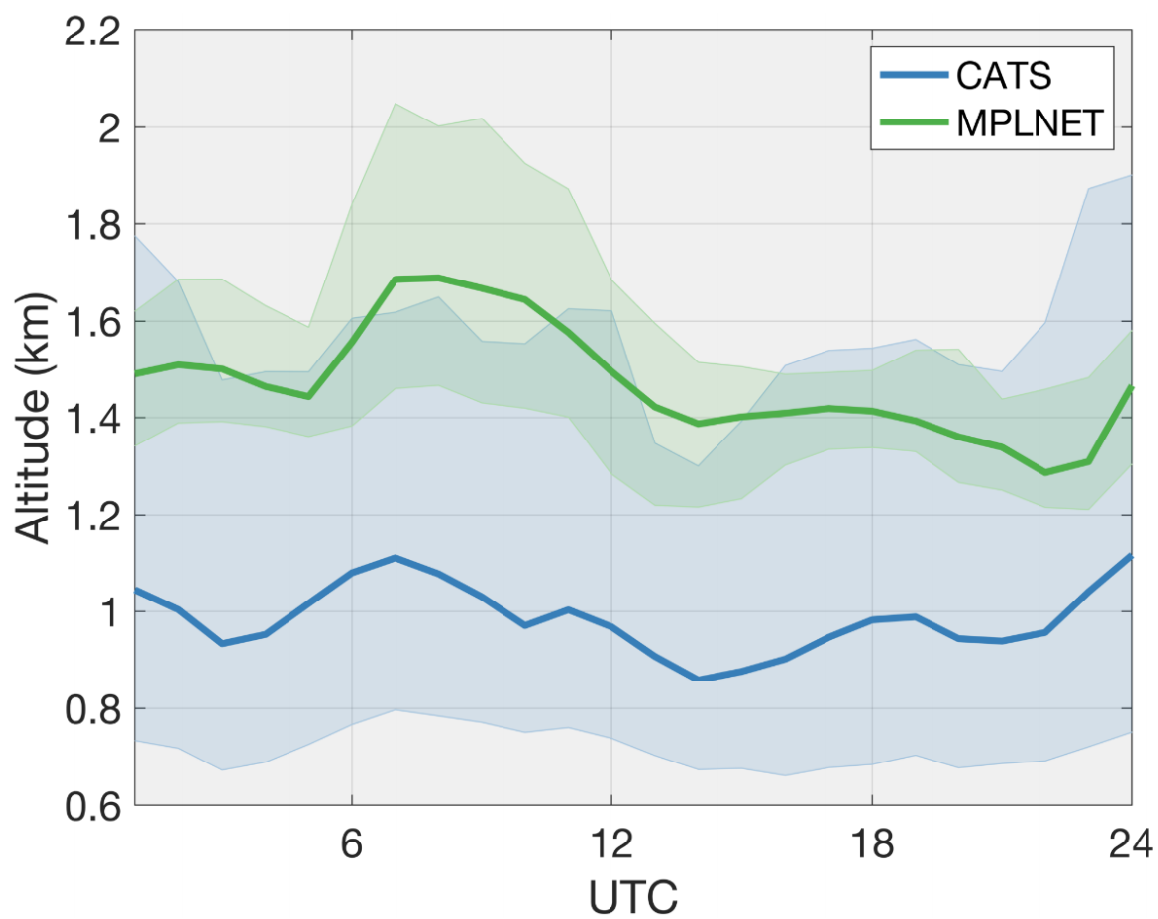

**Figure S4.** Observed diurnal cycle in extinction weighted altitudes for CATS and MPLNET for July, August, September, October, and November for the Southeast Asian region denoted in Figure 6. Shaded region denotes  $\sim 1\sigma$ .
